# Supplementary material
Source: PubMed Central journal article supplement (PMC3881428)
Supplement: NIHMS459756-supplement-1.pdf [file NIHMS459756-supplement-1.pdf]

**Table S1. List of References Used in Meta-analysis of SIRT1 Expression in Breast Cancer Clinical Trials Using Oncomine Database**

| Number | Study                                       | Reference                                  |
|--------|---------------------------------------------|--------------------------------------------|
| 1      | Invasive Breast Carcinoma Stroma vs. Normal | Finak et al, Nat Med, 2008                 |
| 2      | Invasive Breast Carcinoma vs. Normal        | Gluck et al, Breast Cancer Res Treat, 2011 |
| 3      | Invasive Ductal Breast Carcinoma vs. Normal | Ma et al, Breast Cancer Res, 2009          |
| 4      | Ductal Breast Carcinoma vs. Normal          | Richardson et al., Cancer Cell, 2006       |
| 5      | Invasive Breast Carcinoma vs. Normal        | No Associated Paper, 2011                  |
| 6      | Invasive Ductal Breast Carcinoma vs. Normal | No Associated Paper, 2011                  |
| 7      | Invasive Lobular Breast Carcinoma vs Normal | No Associated Paper, 2011                  |
| 8      | Invasive Ductal Breast Carcinoma vs Normal  | Zhao et al, Mol Biol Cell, 2004            |
| 9      | Lobular Breast Carcinoma vs. Normal         | Zhao et al, Mol Biol Cell, 2004            |

**Table S2. Primer Sequences of Different MMP7 Promoter Regions Used for Chromatin Immunoprecipitation (CHIP) Analysis from Kidneys and HMLER Cells by Using Smad4 Antibody**

| MMP7 promoter region | Primers                                                             |
|----------------------|---------------------------------------------------------------------|
| <b>-438 to -379</b>  | forward-ATCAGCTTGGTGCGGCCATC<br>reverse-CTGAGCAGGTGCCACAACAC        |
| <b>-660 to -574</b>  | forward-AACACCAGCAATGCTCCAGG,<br>reverse-AAAGAGGAAAGGAAAGAGGA       |
| <b>-1000 to -800</b> | forward-GAAAAGATCCAAGATTTTACTCC,<br>reverse-ACGTGTGTACAATAAATGAGTAT |
| <b>-364 to -216</b>  | forward-CTTATGCTCTGTTCCACAT,<br>reverse-CTGAATCCACAAGAAACTT         |
